# Supplementary material for: Education and income-based inequality in tooth loss among Brazilian adults: does the place you live make a difference?
Source: Springer Nature journal article supplement (doi:10.1186/s12903-020-01238-9), 2020-09-04

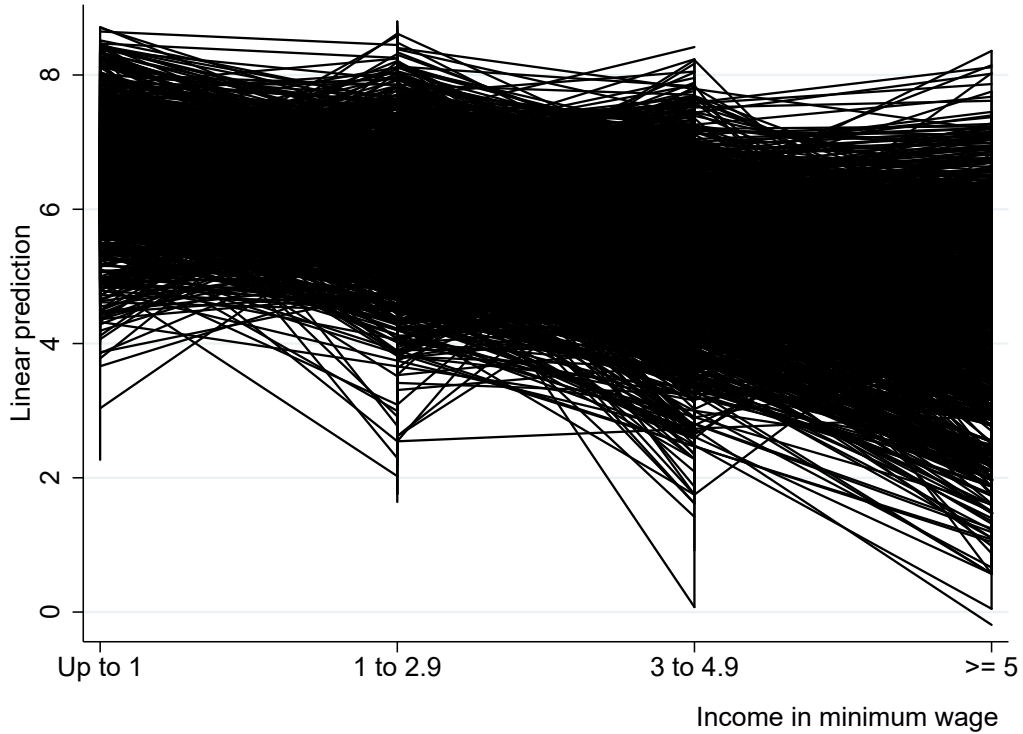

Supplement: MOESM4 [file 18349480]
